# Supplementary material for: A type-I diacylglycerol acyltransferase modulates triacylglycerol biosynthesis and fatty acid composition in the oleaginous microalga, Nannochloropsis oceanica
Source: Springer Nature journal article supplement (doi:10.1186/s13068-017-0858-1), 2017-07-05
Supplement: MOESM1 [file 13068_2017_858_MOESM1_ESM.pdf]

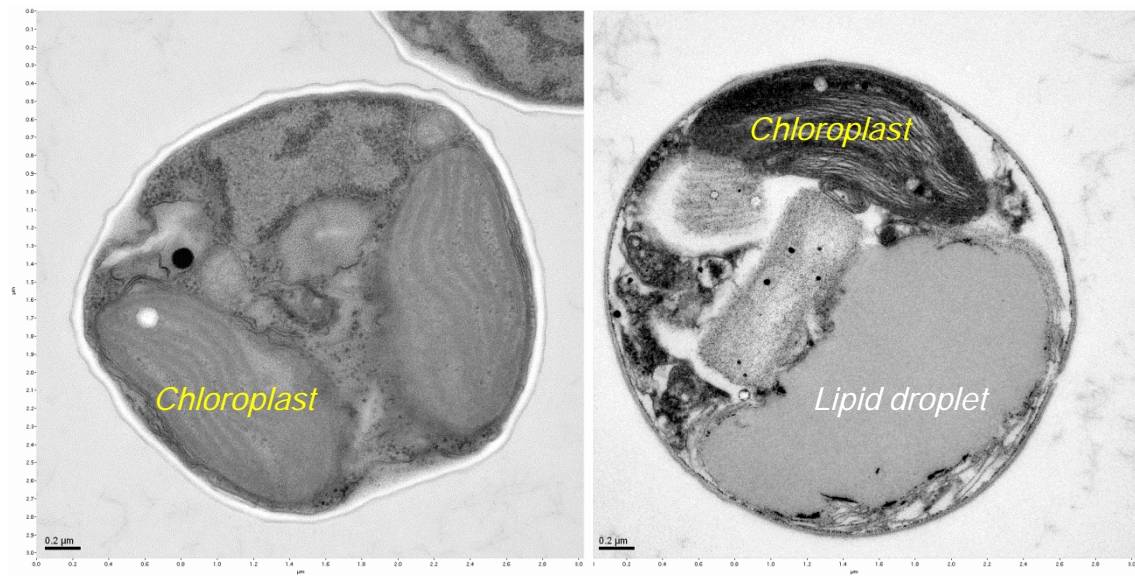

**Figure S1.** The ultrastructure of *N. oceanica* cells under nitrogen-replete (left) and nitrogen-depleted (right) conditions.

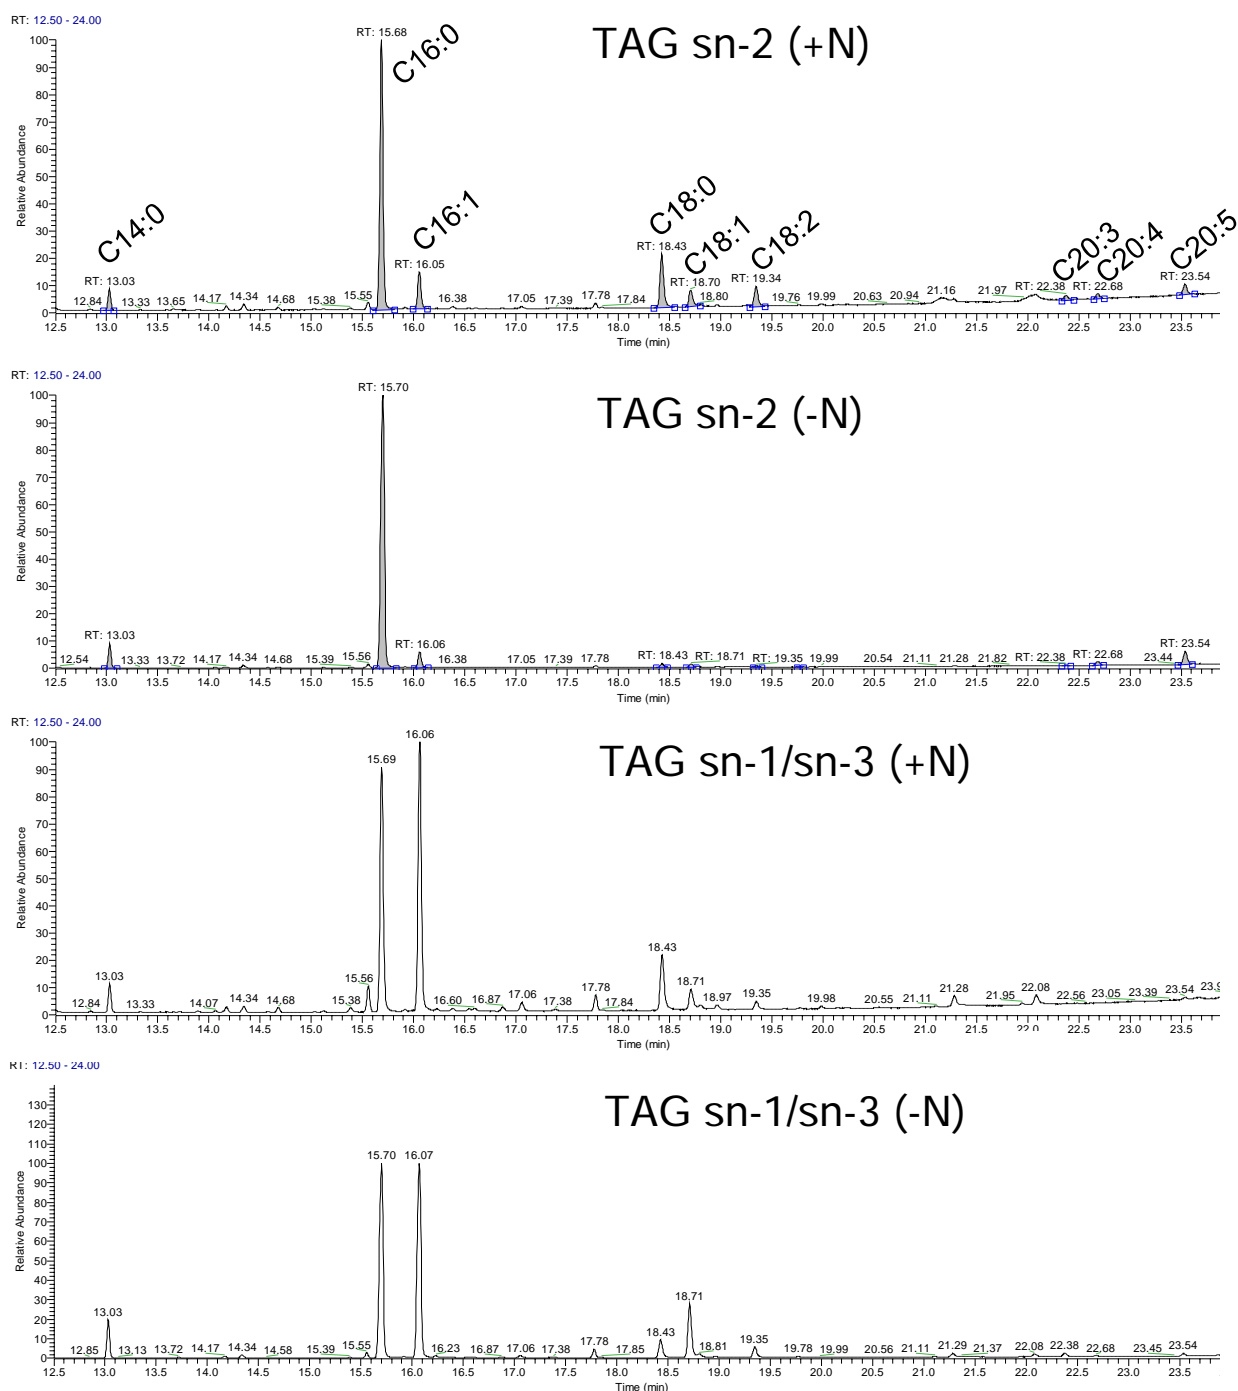

**Figure S2.** GC-MS chromatogram of fatty acids in the *sn*-2 and *sn*-1/*sn*-3 positions of TAG from *N. oceanica* cells under nitrate-replete (+N) and nitrate-depleted (-N) conditions



## NoDGAT1A

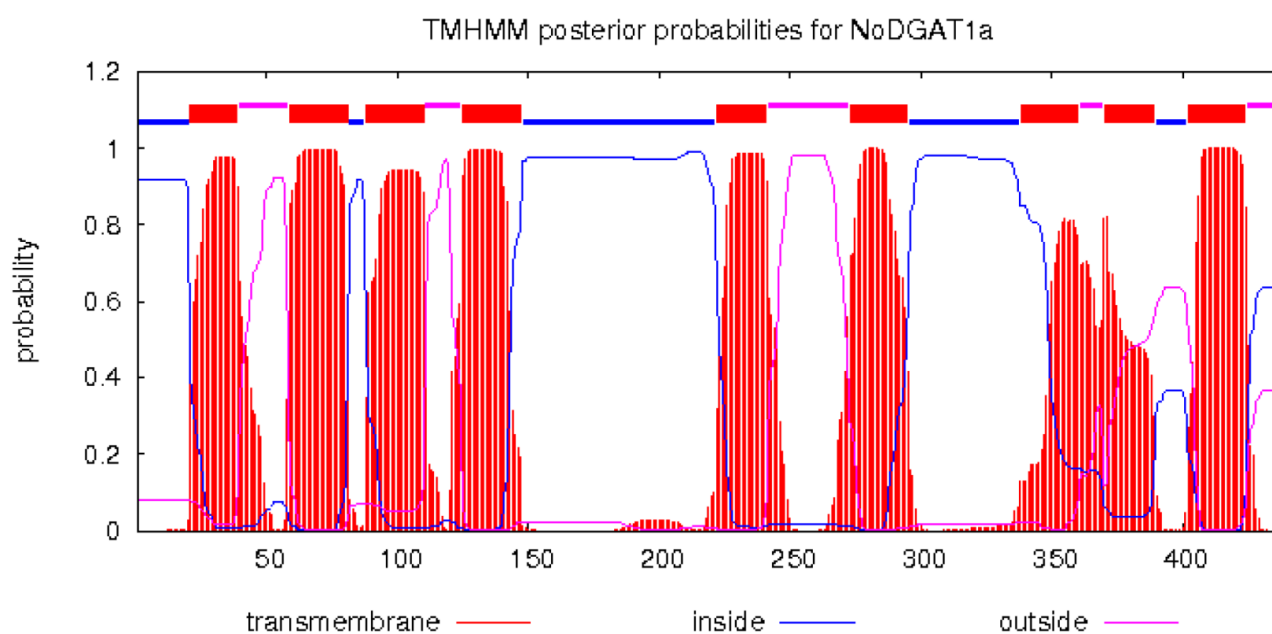

## NoDGAT1B

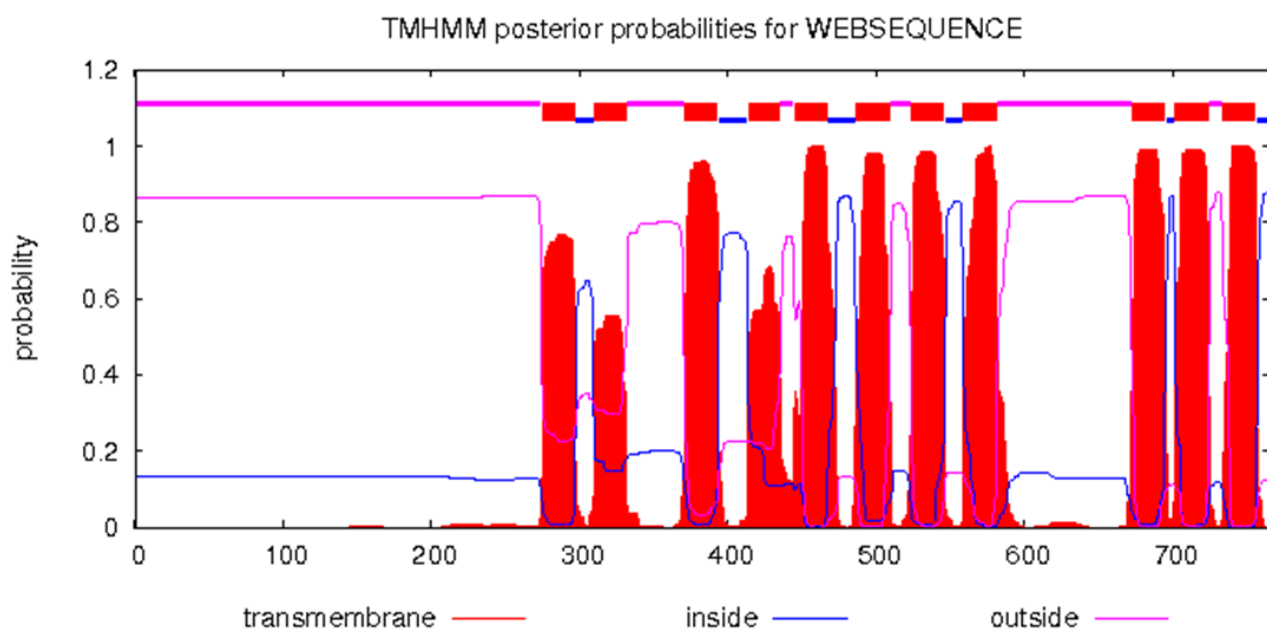

**Figure S4** Predicated transmembrane domains for NoDGAT1A NoDGAT1B by TMHMM (V2.0, <http://www.cbs.dtu.dk/services/TMHMM/>).



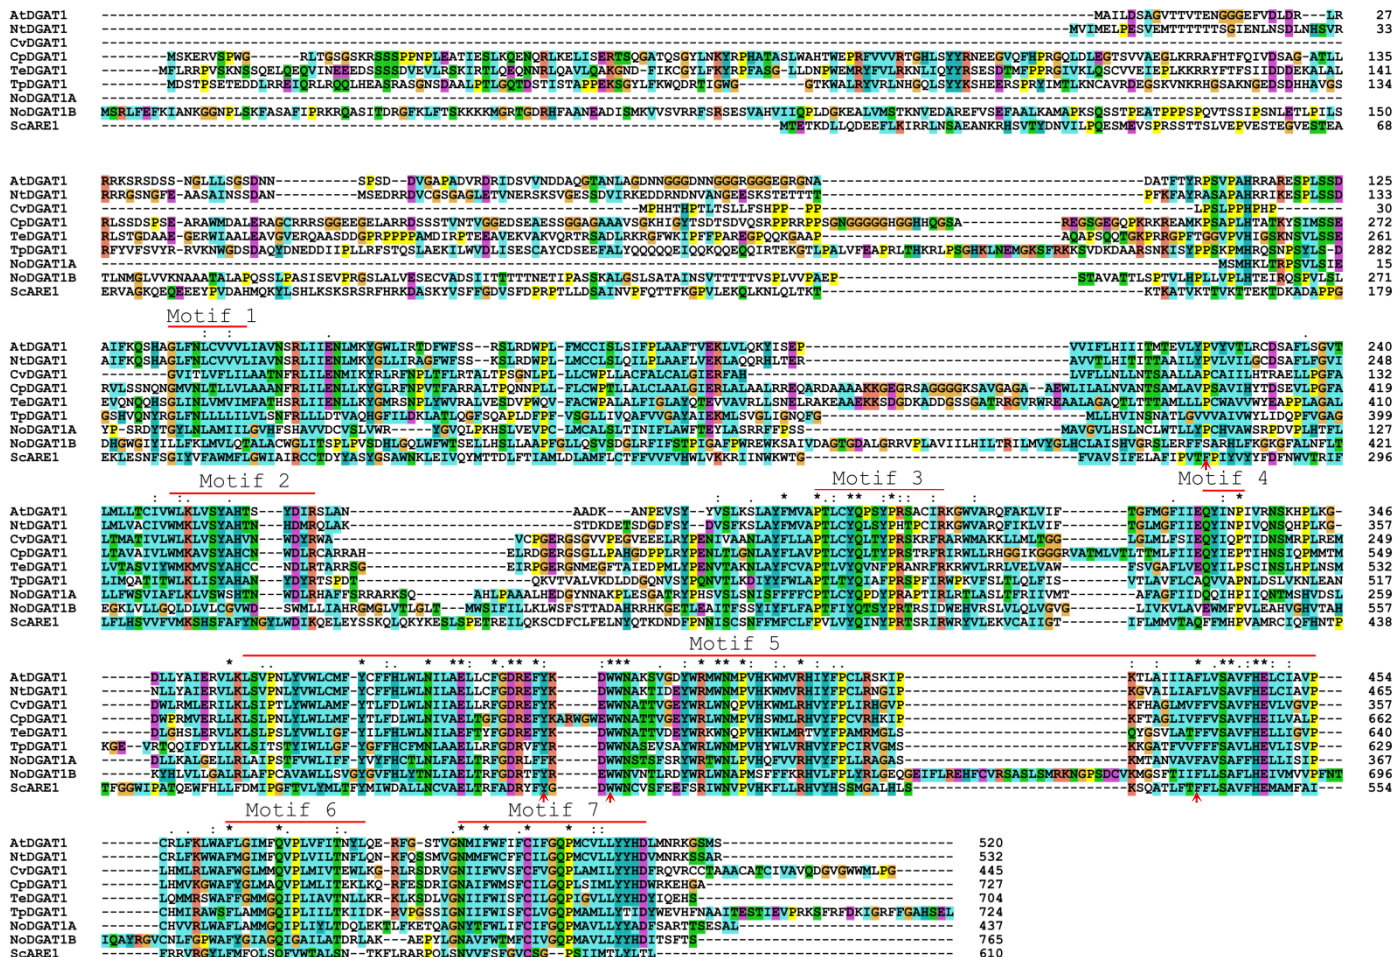

**Figure S5** Protein sequence alignment of putative DGAT1s. The alignment was conducted using ClustalX2.1. The sequences used see Additional file 2: Table S1. Red arrows indicate the key amino acid residues identified by previous studies.

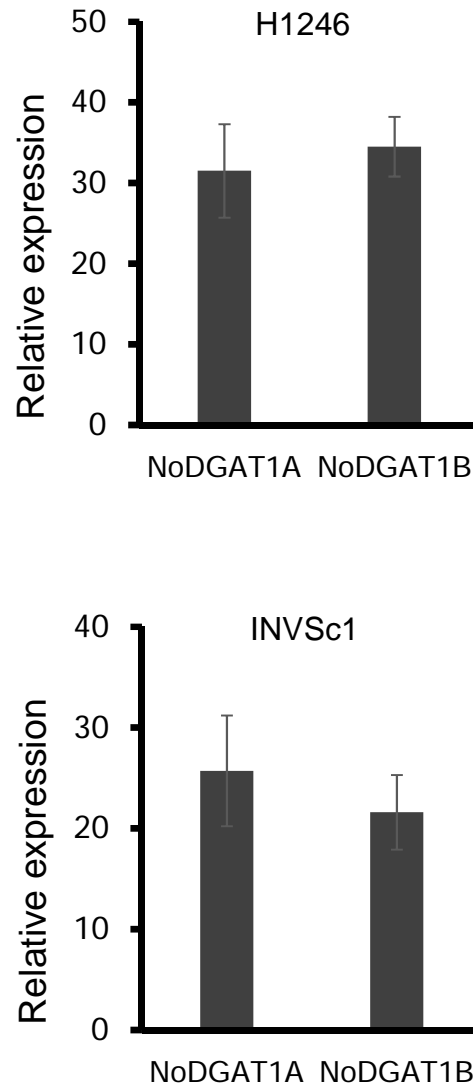

**Figure S6.** The transcriptional expression levels of *NoDGAT1A* and *NoDGAT1B* in H1246 (upper) and INVSc1 (lower), as determined by quantitative real-time PCR. The gene expression levels were normalized to the endogenous *ACT1* gene.

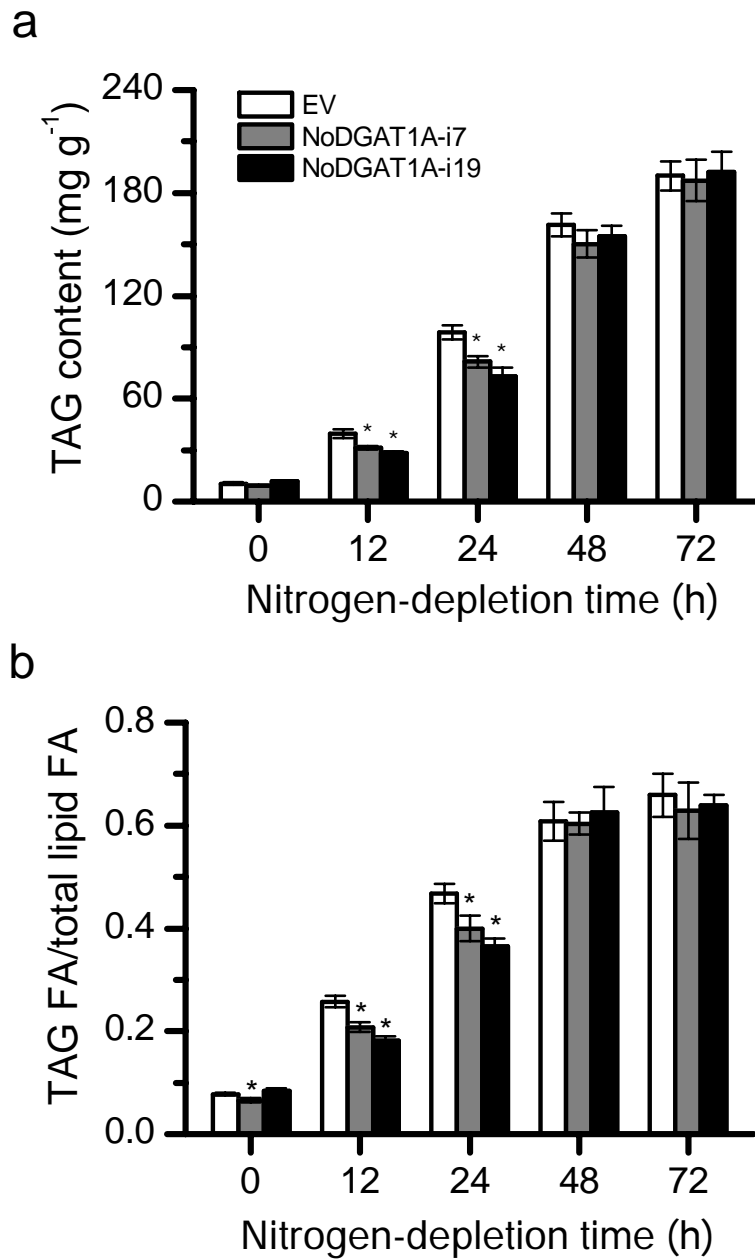

**Figure S7.** TAG content per dry weight (**a**) and the ratio of fatty acids in TAG over TFA (**b**) in *NoDGAT1A* knockdown lines and EV. Algal cells grown in nitrogen-replete medium for 4 days (considered as 0 h of nitrogen depletion) were used for nitrogen depletion experiment. Data are expressed as mean  $\pm$  SD ( $n=3$ ). Asterisks indicate the significant difference compared with EV ( $t$ -test,  $P<0.05$ ).

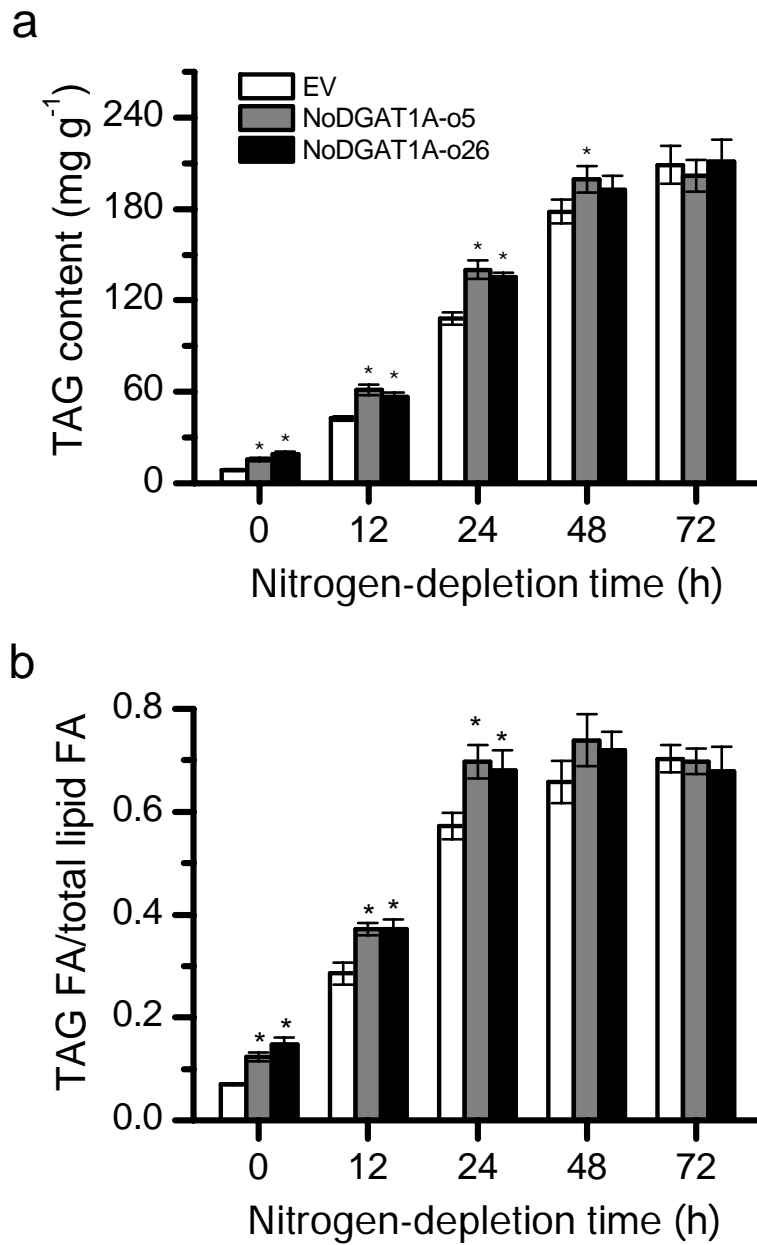

**Figure S8.** TAG content per dry weight (**a**) and the ratio of fatty acids in TAG over TFA (**b**) in *NoDGAT1A* overexpression lines and EV. Algal cells grown in nitrogen-replete medium for 4 days (considered as 0 h of nitrogen depletion) were used for nitrogen depletion experiment. Data are expressed as mean  $\pm$  SD ( $n=3$ ). Asterisks indicate the significant difference compared with EV ( $t$ -test,  $P<0.05$ ).

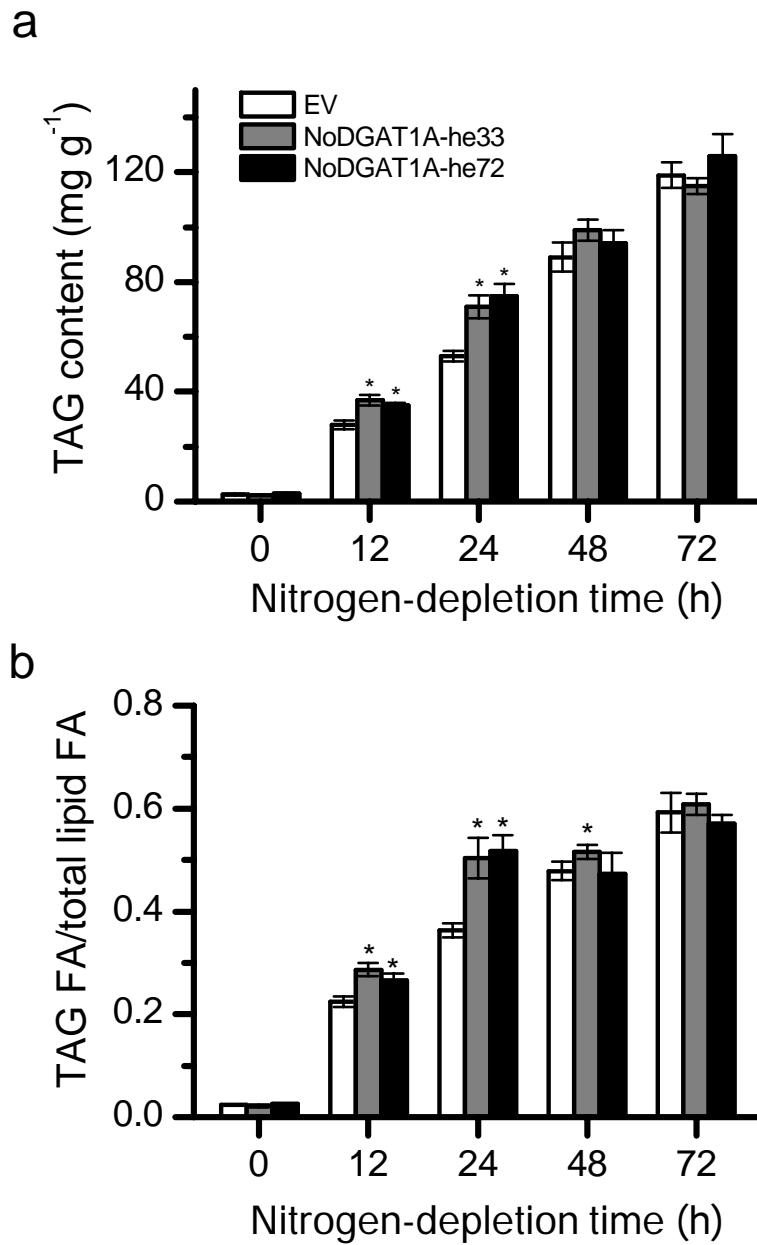

**Figure S9.** TAG content per dry weight (**a**) and the ratio of fatty acids in TAG over TFA (**b**) in *NoDGAT1A* heterologous expression lines of *Chlamydomonas* and EV. Algal cells grown in nitrogen-replete medium for 4 days (considered as 0 h of nitrogen depletion) were used for nitrogen depletion experiment. Data are expressed as mean  $\pm$  SD ( $n=3$ ). Asterisks indicate the significant difference compared with EV ( $t$ -test,  $P<0.05$ ).

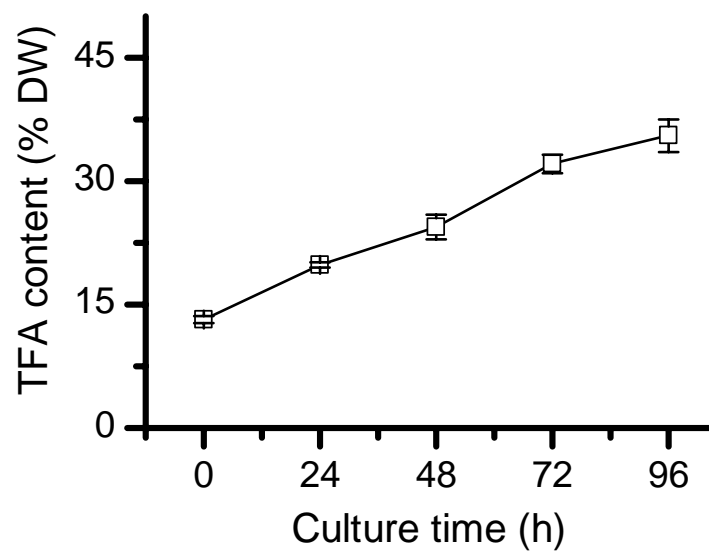

**Figure S10.** Time course of total fatty acid (TFA) content of *N. oceanica* in response to nitrogen depletion.

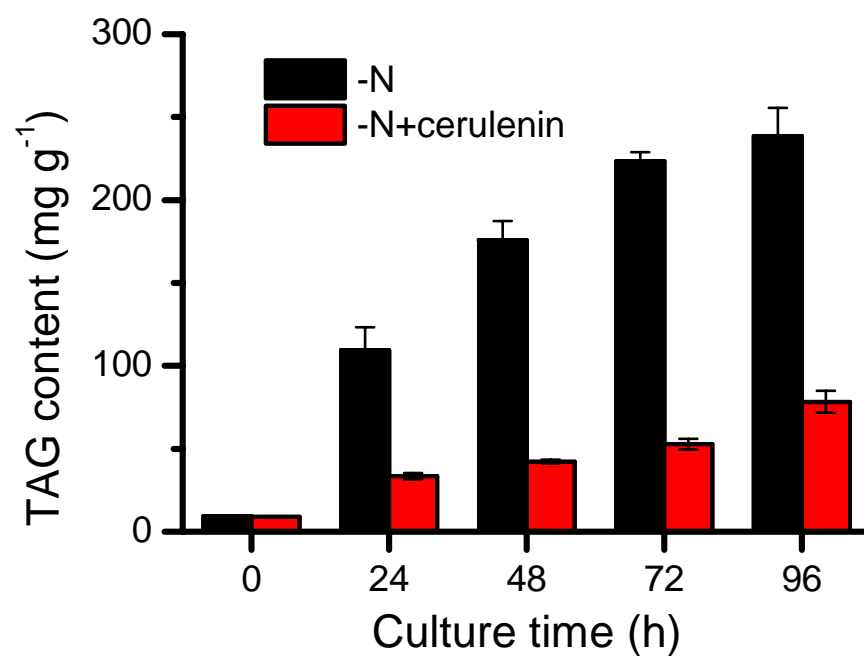

**Figure S11.** Effect of cerulenin on TAG content of *N. oceanica* in response to nitrogen depletion. The cerulenin concentration used was 10  $\mu$ M.



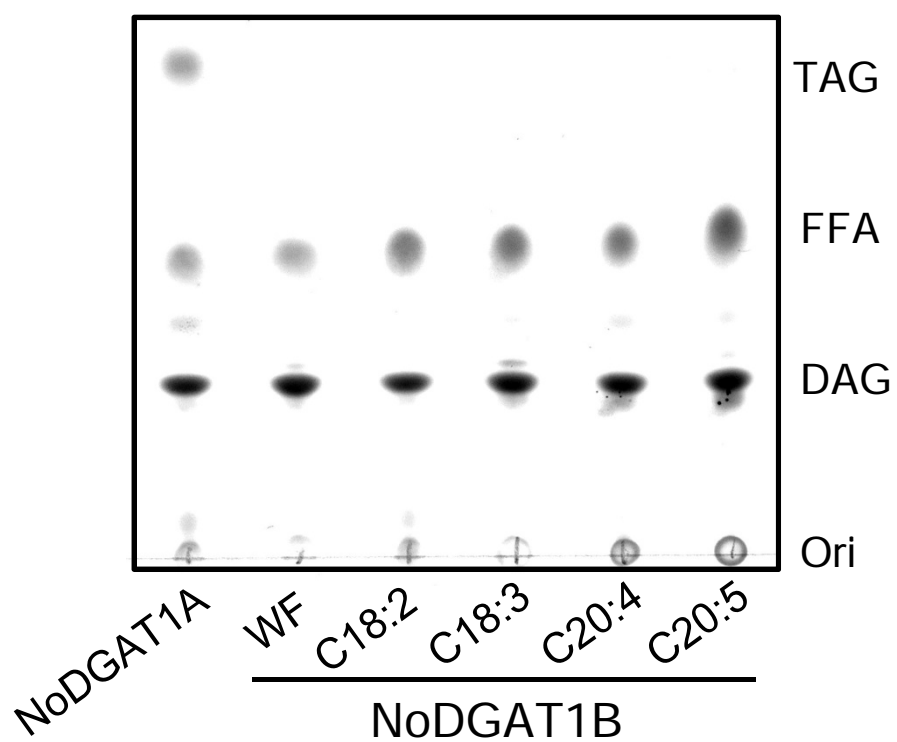

**Figure S12.** TLC analysis of lipids extracted from *NoDGAT1B*-carrying H1246 cells without feeding (WF) or fed with free fatty acids of C18:2, C18:3, C20:4, or C20:5 (125  $\mu$ M). *NoDGAT1A*-carrying H1246 cells were used as the positive control.

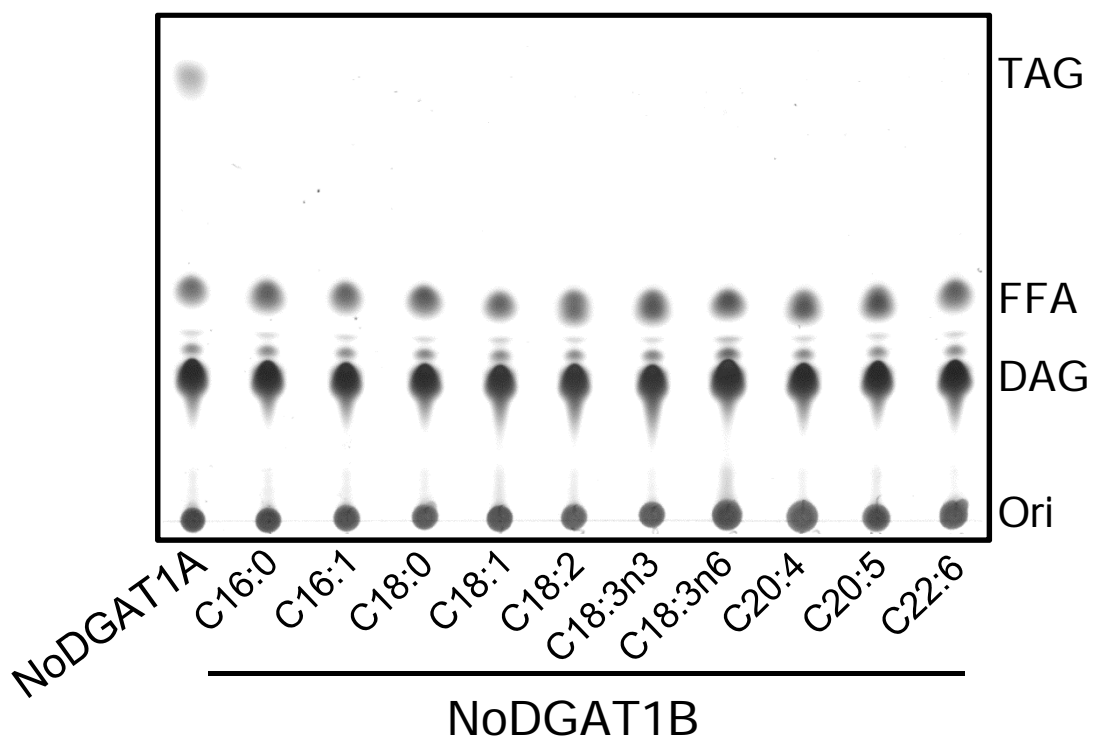

**Figure S13.** TLC analysis of lipids resulting from *in vitro* enzymatic reactions of NoDGAT1B with various acyl-CoAs. C18:1/C16:0-DAG was used as the acyl acceptor; NoDGAT1A was used as the positive control (C16:0 as the acyl donor).

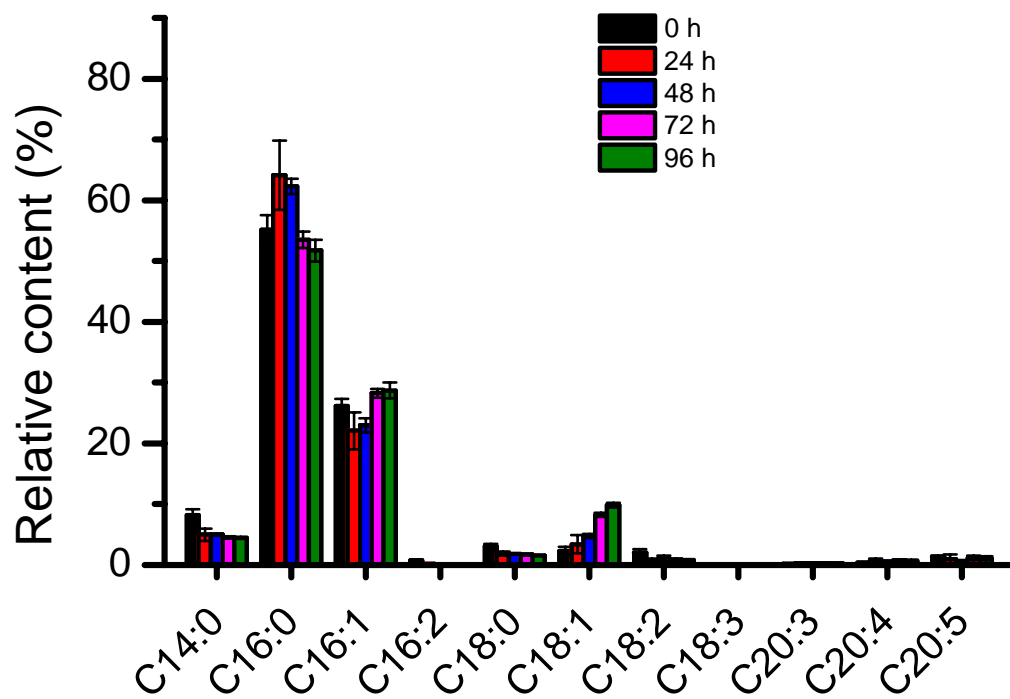

**Figure S14.** Fatty acid composition of TAG in *N. oceanica* upon nitrogen depletion

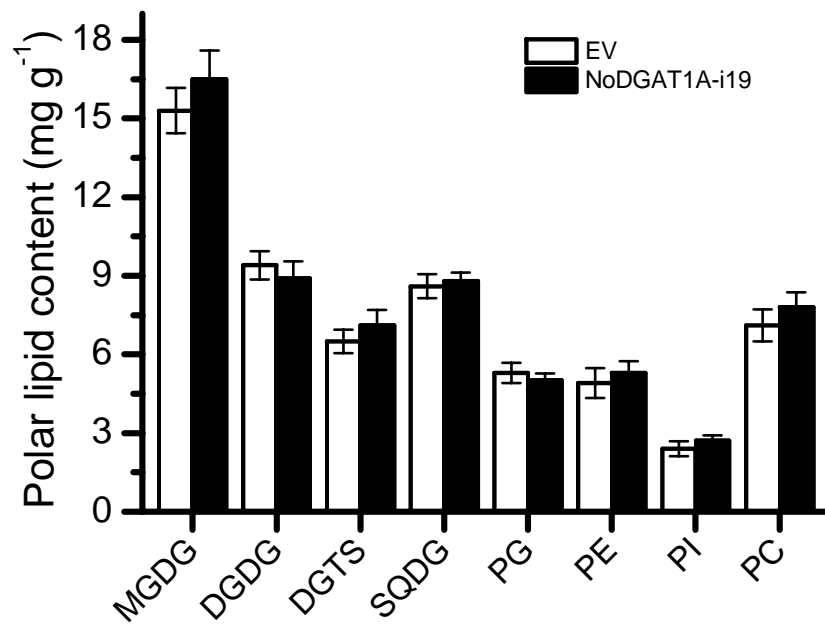

**Figure S15** The contents of polar lipids in EV and NoDGAT1A-i19 under nitrogen-depleted conditions (24 h).

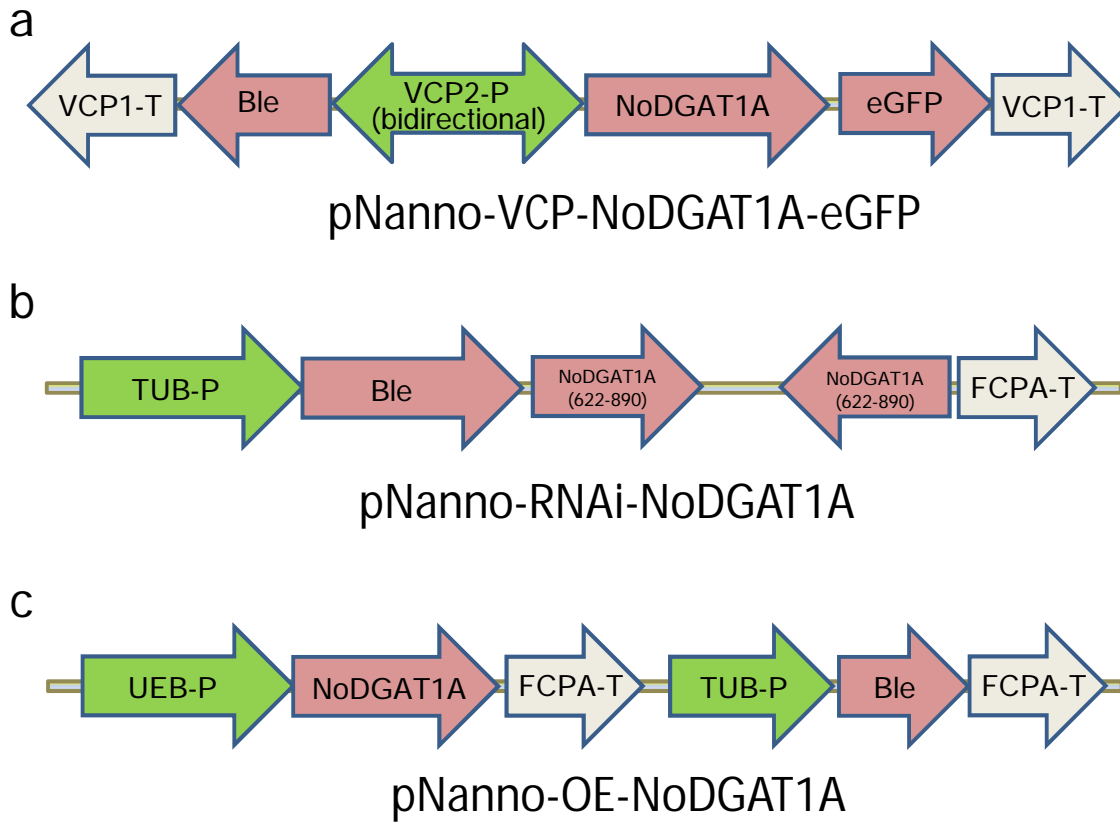

**Figure S16** Schematic illustration of constructs for subcellular localization (**a**), knockdown (**b**), and overexpression (**c**) of NoDGAT1A in *N. oceanica* cells.
